# Supplementary material for: Genetic Analysis of Dengue Virus in Severe and Non-Severe Cases in Dhaka, Bangladesh, in 2018–2022
Source: MDPI journal article supplement (doi:10.3390/v15051144), 2023-05-10
Supplement: s1 [file s1]

**Table S1. Primers used to amplify the envelope region and for sequencing**

**Amplification**

| Fragment |              | Antisense primers | Sequence 5'-3'          | Sense-primer | Sequence 5'-3'                            |
|----------|--------------|-------------------|-------------------------|--------------|-------------------------------------------|
| DENV1-E  | One -step RT | d1a17             | CCAATGGCYGCTGAYAG TCT   | d1s1C        | <u>GATGAGGGAAGATGGGGAGTTG</u> TTA         |
|          | Nested PCR   | d1a17             | CCAATGGCYGCTGAYAG TCT   | d1s3         | GTCTACGTGGAC<br>ATAAACGTTCTGTCGCATTGGC    |
| DENV2-E  | One -step RT | 2447R             | TTCCAGCTCACAACGCAA CCAC | d2s1C        | <u>GATGAGGGAAGATGGGGAGTTG</u> TTA         |
|          | Nested PCR   | 2447R             | TTCCAGCTCACAACGCAA CCAC | 618F         | GTCTACGTGGAC<br>ACCAGAAGACATAGAYTGTTG GTG |
| DENV3-E  | One -step RT | d3s2              | CAACATGTGCACACTCAT AGCC | DV3_R        | CCACAAC TACCGTTAATTTGAT                   |
|          | Nested PCR   | d3_815F           | GCCCTTAGGCACCCAGG GTT   | DV3_R        | CCACAAC TACCGTTAATTTGAT                   |

**Sequencing**

| Fragment | Sense-primer                                        | Sequence 5'-3'                                                                                   |
|----------|-----------------------------------------------------|--------------------------------------------------------------------------------------------------|
| DENV1-E  | 1471R<br>d1s4(1204F)<br>d1s5(1709F)<br>d1a17(2559R) | TCCGTAGTCRGTCAGCT<br>TGTGTGTTCGMCGAACGTT<br>GCAATGCAYACTGCGTTG<br>CCRATGGCYGCTGAYAGTCT           |
| DENV2-E  | 865Fx<br>1222F<br>1577Fx<br>2037F                   | ACCATAGGRACRACAYATTTCC<br>ATGGTAGAYAGAGGATGGG<br>TAGACCTGCCRTTACCATG<br>AGAAGCAGAACCYCCATTYG     |
| DENV3-E  | 815F<br>1243F<br>1531F<br>2590R                     | GCCCTTAGGCACCCAGGGTT<br>CGGTTGTGGTTTGTGTTGG<br>GAAGAACAAAGCATGGATGGTA<br>CCACAAC TACCGTTAATTTGAT |

| <b>Table S2.</b> GenBank sequences of the envelope region used for phylogenetic analysis |                 |                         |                  |             |
|------------------------------------------------------------------------------------------|-----------------|-------------------------|------------------|-------------|
| <b>Serotype</b>                                                                          | <b>Genotype</b> | <b>Accession Number</b> | <b>Country</b>   | <b>Year</b> |
| DENV-1                                                                                   | I               | KX595191                | Vietnam          | 2013        |
| DENV-1                                                                                   | I               | KF887994                | Thailand         | 2013        |
| DENV-1                                                                                   | I               | HG316481                | Thailand         | 2010        |
| DENV-1                                                                                   | I               | AY732482                | Thailand         | 2001        |
| DENV-1                                                                                   | I               | AY732475                | Thailand         | 1994        |
| DENV-1                                                                                   | I               | AY732480                | Thailand         | 2004        |
| DENV-1                                                                                   | I               | AY732477                | Thailand         | 1991        |
| DENV-1                                                                                   | I               | AF350498                | China            | 1980        |
| DENV-1                                                                                   | I               | AY732481                | Thailand         | 1982        |
| DENV-1                                                                                   | I               | AY732483                | Thailand         | 1981        |
| DENV-1                                                                                   | I               | AB074760                | Japan            | 1943        |
| DENV-1                                                                                   | II              | AF180817                | Thailand         | 1964        |
| DENV-1                                                                                   | III             | EF457905                | Malaysia         | 1972        |
| DENV-1                                                                                   | IV              | DQ672560                | French Polynesia | 2001        |
| DENV-1                                                                                   | IV              | AB189120                | Indonesia        | 1998        |
| DENV-1                                                                                   | IV              | DQ285560                | Reunion          | 2004        |
| DENV-1                                                                                   | IV              | KC762651                | Indonesia        | 2007        |
| DENV-1                                                                                   | IV              | GQ868602                | Philippines      | 2004        |
| DENV-1                                                                                   | V               | MK517747                | China            | 2018        |
| DENV-1                                                                                   | V               | MK517746                | Bangladesh       | 2017        |
| DENV-1                                                                                   | V               | MK517743                | China            | 2018        |
| DENV-1                                                                                   | V               | MG894942                | Maldives         | 2016        |
| DENV-1                                                                                   | V               | LC436668                | Bangladesh       | 2017        |
| DENV-1                                                                                   | V               | LC436610                | Bangladesh       | 2017        |
| DENV-1                                                                                   | V               | LC436667                | Bangladesh       | 2017        |
| DENV-1                                                                                   | V               | MG738056                | China            | 2016        |
| DENV-1                                                                                   | V               | MG894946                | Malaysia         | 2016        |
| DENV-1                                                                                   | V               | MG894912                | Maldives         | 2016        |
| DENV-1                                                                                   | V               | MG894884                | Thailand         | 2015        |
| DENV-1                                                                                   | V               | LC436608                | Bangladesh       | 2017        |
| DENV-1                                                                                   | V               | MG737898                | Bangladesh       | 2015        |
| DENV-1                                                                                   | V               | MG894789                | Malaysia         | 2013        |
| DENV-1                                                                                   | V               | LC038145                | Malaysia         | 2014        |
| DENV-1                                                                                   | V               | LC436612                | Bangladesh       | 2017        |
| DENV-1                                                                                   | V               | LC436607                | Bangladesh       | 2017        |
| DENV-1                                                                                   | V               | LC436609                | Bangladesh       | 2017        |
| DENV-1                                                                                   | V               | MG840568                | China            | 2016        |
| DENV-1                                                                                   | V               | MG738024                | China            | 2016        |
| DENV-1                                                                                   | V               | MF033243                | Singapore        | 2016        |
| DENV-1                                                                                   | V               | MH680025                | Singapore        | 2014        |
| DENV-1                                                                                   | V               | KM403585                | Singapore        | 2013        |
| DENV-1                                                                                   | V               | MG894690                | Bangladesh       | 2011        |

|        |                |            |            |      |
|--------|----------------|------------|------------|------|
| DENV-1 | V              | KP849889   | Bhutan     | 2013 |
| DENV-1 | V              | KP849864   | Bhutan     | 2013 |
| DENV-1 | V              | MH679963   | Singapore  | 2015 |
| DENV-1 | V              | KX380803   | Singapore  | 2013 |
| DENV-1 | V              | MG894721   | Bangladesh | 2012 |
| DENV-1 | V              | MG894720   | Bangladesh | 2012 |
| DENV-1 | V              | MH680112   | Singapore  | 2014 |
| DENV-1 | V              | MH679981   | Singapore  | 2015 |
| DENV-1 | V              | KX380801   | Singapore  | 2012 |
| DENV-1 | V              | KP723473   | China      | 2014 |
| DENV-1 | V              | KX621249   | China      | 2014 |
| DENV-1 | V              | JN036371   | Bangladesh | 2009 |
| DENV-1 | V              | KF289072   | India      | 2011 |
| DENV-1 | V              | JQ917404   | India      | 2009 |
| DENV-1 | V              | AY732474   | Thailand   | 1980 |
| DENV-1 | V              | AY732476   | Thailand   | 1980 |
| DENV-1 | V              | AY722803   | Myanmar    | 1998 |
| DENV-1 | V              | AF226685   | Brazil     | 1990 |
| DENV-1 | V              | AF514889   | Argentina  | 2000 |
| DENV-1 | VI             | KR919820   | Brunei     | 2014 |
| DENV-2 | Cosmopolitan C | OM791801.1 | Peru       | 2019 |
| DENV-2 | Cosmopolitan C | ON123639.1 | Peru       | 2021 |
| DENV-2 | Cosmopolitan C | ON123643.1 | Peru       | 2021 |
| DENV-2 | Cosmopolitan C | ON123642.1 | Peru       | 2021 |
| DENV-2 | Cosmopolitan C | ON123638.1 | Peru       | 2021 |
| DENV-2 | Cosmopolitan C | MK848418.1 | Bangladesh | 2018 |
| DENV-2 | Cosmopolitan C | LC436620.1 | Bangladesh | 2017 |
| DENV-2 | Cosmopolitan C | LC436672   | Bangladesh | 2017 |
| DENV-2 | Cosmopolitan C | LC436653.1 | Bangladesh | 2017 |
| DENV-2 | Cosmopolitan C | LC436617.1 | Bangladesh | 2017 |
| DENV-2 | Cosmopolitan C | LC436646   | Bangladesh | 2017 |
| DENV-2 | Cosmopolitan C | LC436652   | Bangladesh | 2017 |
| DENV-2 | Cosmopolitan C | LC436651   | Bangladesh | 2017 |
| DENV-2 | Cosmopolitan C | MN328061.1 | Bangladesh | 2019 |
| DENV-2 | Cosmopolitan C | LC436627   | Bangladesh | 2017 |
| DENV-2 | Cosmopolitan C | LC436640   | Bangladesh | 2017 |
| DENV-2 | Cosmopolitan C | LC436632   | Bangladesh | 2017 |
| DENV-2 | Cosmopolitan C | LC436633   | Bangladesh | 2017 |
| DENV-2 | Cosmopolitan C | LC436645   | Bangladesh | 2017 |
| DENV-2 | Cosmopolitan C | LC436630   | Bangladesh | 2017 |
| DENV-2 | Cosmopolitan C | LC43662909 | Bangladesh | 2017 |
| DENV-2 | Cosmopolitan C | LC436624   | Bangladesh | 2017 |
| DENV-2 | Cosmopolitan C | LC436644   | Bangladesh | 2017 |
| DENV-2 | Cosmopolitan C | LC436657   | Bangladesh | 2017 |
| DENV-2 | Cosmopolitan C | LC436648   | Bangladesh | 2017 |
| DENV-2 | Cosmopolitan C | LC436637   | Bangladesh | 2017 |
| DENV-2 | Cosmopolitan C | LC436634   | Bangladesh | 2017 |
| DENV-2 | Cosmopolitan C | LC436638   | Bangladesh | 2017 |
| DENV-2 | Cosmopolitan C | LC436613   | Bangladesh | 2017 |

|        |                |            |             |      |
|--------|----------------|------------|-------------|------|
| DENV-2 | Cosmopolitan C | LC436669   | Bangladesh  | 2017 |
| DENV-2 | Cosmopolitan C | LC436649   | Bangladesh  | 2017 |
| DENV-2 | Cosmopolitan C | LC436642   | Bangladesh  | 2017 |
| DENV-2 | Cosmopolitan C | LC436623   | Bangladesh  | 2017 |
| DENV-2 | Cosmopolitan C | LC436641   | Bangladesh  | 2017 |
| DENV-2 | Cosmopolitan C | LC436626   | Bangladesh  | 2017 |
| DENV-2 | Cosmopolitan C | LC436635   | Bangladesh  | 2017 |
| DENV-2 | Cosmopolitan C | LC436636   | Bangladesh  | 2017 |
| DENV-2 | Cosmopolitan C | LC436622   | Bangladesh  | 2017 |
| DENV-2 | Cosmopolitan C | LC436628   | Bangladesh  | 2017 |
| DENV-2 | Cosmopolitan C | LC436631.1 | Bangladesh  | 2017 |
| DENV-2 | Cosmopolitan C | LC436639   | Bangladesh  | 2017 |
| DENV-2 | Cosmopolitan C | LC436625.1 | Bangladesh  | 2017 |
| DENV-2 | Cosmopolitan C | LC436643.1 | Bangladesh  | 2017 |
| DENV-2 | Cosmopolitan C | MG895063.1 | Malaysia    | 2014 |
| DENV-2 | Cosmopolitan C | LC436614   | Bangladesh  | 2017 |
| DENV-2 | Cosmopolitan C | LC436675   | Bangladesh  | 2017 |
| DENV-2 | Cosmopolitan C | LC436659   | Bangladesh  | 2017 |
| DENV-2 | Cosmopolitan C | LC436615   | Bangladesh  | 2017 |
| DENV-2 | Cosmopolitan C | LC436674   | Bangladesh  | 2017 |
| DENV-2 | Cosmopolitan C | LC436656   | Bangladesh  | 2017 |
| DENV-2 | Cosmopolitan C | LC436647   | Bangladesh  | 2017 |
| DENV-2 | Cosmopolitan C | LC436616   | Bangladesh  | 2017 |
| DENV-2 | Cosmopolitan C | LC436673   | Bangladesh  | 2017 |
| DENV-2 | Cosmopolitan C | LC436655   | Bangladesh  | 2017 |
| DENV-2 | Cosmopolitan C | LC436654   | Bangladesh  | 2017 |
| DENV-2 | Cosmopolitan C | LC436658   | Bangladesh  | 2017 |
| DENV-2 | Cosmopolitan C | MW512387.1 | Singapore   | 2013 |
| DENV-2 | Cosmopolitan C | MN955685   | Thailand    | 2018 |
| DENV-2 | Cosmopolitan C | LC410191   | Thailand    | 2017 |
| DENV-2 | Cosmopolitan C | LC410190   | Thailand    | 2016 |
| DENV-2 | Cosmopolitan C | MZ277524   | India       | 2018 |
| DENV-2 | Cosmopolitan C | KX621247   | China       | 2015 |
| DENV-2 | Cosmopolitan C | KX372564.1 | Australia   | 2015 |
| DENV-2 | Cosmopolitan C | KY921905.1 | Singapore   | 2015 |
| DENV-2 | Cosmopolitan C | MW512457.1 | Singapore   | 2016 |
| DENV-2 | Cosmopolitan C | KY495802   | India       | 2016 |
| DENV-2 | Cosmopolitan C | MN602605.1 | Sri Lanka   | 2017 |
| DENV-2 | Cosmopolitan C | MG895089.1 | Malaysia    | 2015 |
| DENV-2 | Cosmopolitan C | KU517847.1 | Philippines | 2015 |
| DENV-2 | Cosmopolitan C | KX452030   | Malaysia    | 2014 |
| DENV-2 | Cosmopolitan C | MW512395.1 | Singapore   | 2013 |
| DENV-2 | Cosmopolitan C | KT232052.1 | Nepal       | 2013 |
| DENV-2 | Cosmopolitan C | JF327392   | Singapore   | 2009 |
| DENV-2 | Cosmopolitan C | EU179857   | Brunei      | 2005 |
| DENV-2 | Cosmopolitan C | HM488257   | Guam        | 2001 |
| DENV-2 | Cosmopolitan C | AY858035   | Indonesia   | 2004 |
| DENV-2 | Cosmopolitan C | EU482672   | Vietnam     | 2006 |
| DENV-2 | Cosmopolitan C | EU081177   | Singapore   | 2005 |

|        |                |            |                  |      |
|--------|----------------|------------|------------------|------|
| DENV-2 | Cosmopolitan C | KY794785   | Papua New Guinea | 2010 |
| DENV-2 | Cosmopolitan C | AY037116   | Australia        | 1993 |
| DENV-2 | Cosmopolitan C | FJ196853   | China            | 2003 |
| DENV-2 | Cosmopolitan C | AB189122   | Indonesia        | 1998 |
| DENV-2 | Cosmopolitan C | DQ645546   | Taiwan           | 2002 |
| DENV-2 | Cosmopolitan A | EU056810   | Burkina Faso     | 1983 |
| DENV-2 | Cosmopolitan A | L10044.1   | Indonesia        | 1976 |
| DENV-2 | Cosmopolitan A | GQ398259   | Indonesia        | 1976 |
| DENV-2 | Cosmopolitan A | GQ398258   | Indonesia        | 1975 |
| DENV-2 | Cosmopolitan B | KT781532   | Bangladesh       | 2011 |
| DENV-2 | Cosmopolitan B | JN036375   | Bangladesh       | 2008 |
| DENV-2 | Cosmopolitan B | JN036372   | Bangladesh       | 2009 |
| DENV-2 | Cosmopolitan B | JN036379   | Bangladesh       | 2006 |
| DENV-2 | Cosmopolitan B | JN036377   | Bangladesh       | 2008 |
| DENV-2 | Cosmopolitan B | JN036380   | Bangladesh       | 2006 |
| DENV-2 | Cosmopolitan B | FJ898454   | India            | 2006 |
| DENV-2 | Cosmopolitan B | JN036378   | Bangladesh       | 2007 |
| DENV-2 | Cosmopolitan B | JN036374   | Bangladesh       | 2009 |
| DENV-2 | Cosmopolitan B | JN036373   | Bangladesh       | 2009 |
| DENV-2 | Cosmopolitan B | JN036376   | Bangladesh       | 2008 |
| DENV-2 | Cosmopolitan B | EU448423   | Bangladesh       | 2005 |
| DENV-2 | Cosmopolitan B | EU448424   | Bangladesh       | 2004 |
| DENV-2 | Cosmopolitan B | MZ277456   | India            | 2018 |
| DENV-2 | Cosmopolitan B | MH594921   | India            | 2017 |
| DENV-2 | Cosmopolitan B | MK858105   | India            | 2016 |
| DENV-2 | Cosmopolitan B | KF364499   | India            | 2012 |
| DENV-2 | Cosmopolitan B | KF364504   | India            | 2008 |
| DENV-2 | Cosmopolitan B | KF577806   | India            | 2010 |
| DENV-2 | Cosmopolitan B | JQ955624   | India            | 2011 |
| DENV-2 | Cosmopolitan B | GQ252677   | Sri Lanka        | 2004 |
| DENV-2 | Cosmopolitan B | KJ010186   | Pakistan         | 2013 |
| DENV-2 | Cosmopolitan B | AF276619   | China            | 2000 |
| DENV-2 | Cosmopolitan B | AF359579   | China            | 1999 |
| DENV-2 | Cosmopolitan B | LC436618   | Bangladesh       | 2017 |
| DENV-2 | Cosmopolitan B | LC436671   | Bangladesh       | 2017 |
| DENV-2 | Cosmopolitan B | LC436650   | Bangladesh       | 2017 |
| DENV-2 | Cosmopolitan B | LC436619   | Bangladesh       | 2017 |
| DENV-2 | Cosmopolitan B | LC436670   | Bangladesh       | 2017 |
| DENV-2 | Cosmopolitan B | MW512449.1 | Singapore        | 2016 |
| DENV-2 | Cosmopolitan B | MH822952.1 | India            | 2014 |
| DENV-2 | Cosmopolitan B | MH209618.1 | India            | 2015 |
| DENV-2 | Cosmopolitan B | MK858096.1 | India            | 2014 |
| DENV-2 | Cosmopolitan B | KX061419.1 | India            | 2015 |
| DENV-2 | Cosmopolitan B | LC121816   | Ethiopia         | 2016 |
| DENV-2 | Cosmopolitan B | JX475906   | India            | 2009 |
| DENV-2 | Cosmopolitan B | MZ277472   | India            | 2018 |
| DENV-2 | Cosmopolitan B | KY427084   | India            | 2010 |
| DENV-2 | Cosmopolitan B | FJ882602   | Sri Lanka        | 1996 |
| DENV-2 | Cosmopolitan B | MW946478   | India            | 1974 |

|        |                 |            |                  |      |
|--------|-----------------|------------|------------------|------|
| DENV-2 | Cosmopolitan B  | AF231716.1 | Malaysia         | 1969 |
| DENV-2 | Asian-I         | FJ898452   | Thailand         | 2003 |
| DENV-2 | Asian-I         | MS8455     | Malaysia         | 1987 |
| DENV-2 | Asian-I         | D00345.1   | Thailand         | 1980 |
| DENV-2 | Asian-I         | NC001474   | Thailand         | 1964 |
| DENV-2 | Asian-II        | AF038403   | New Guinea       | 1944 |
| DENV-2 | Asian-II        | GQ398268   | Indonesia        | 1975 |
| DENV-2 | Asian/ American | HQ999999   | Guatemala-       | 2009 |
| DENV-2 | Asian/ American | KF955363.1 | Puerto Rico      | 1986 |
| DENV-2 | Asian/ American | JN819418.1 | Vietnam          | 1988 |
| DENV-2 | American        | GQ868592   | Colombia         | 1986 |
| DENV-3 | I               | MW396468   | Bangladesh       | 2019 |
| DENV-3 | I               | MW396464   | Bangladesh       | 2019 |
| DENV-3 | I               | ON907583.1 | Bangladesh       | 2019 |
| DENV-3 | I               | ON908231.1 | Bangladesh China | 2019 |
| DENV-3 | I               | ON908235.1 | Bangladesh China | 2019 |
| DENV-3 | I               | MN922034.1 | Bangladesh       | 2019 |
| DENV-3 | I               | MN922033.1 | Bangladesh       | 2019 |
| DENV-3 | I               | ON116130.1 | Bangladesh       | 2021 |
| DENV-3 | I               | LC436660   | Bangladesh       | 2017 |
| DENV-3 | I               | LC436666   | Bangladesh       | 2017 |
| DENV-3 | I               | LC436664   | Bangladesh       | 2017 |
| DENV-3 | I               | LC436677   | Bangladesh       | 2017 |
| DENV-3 | I               | LC436663   | Bangladesh       | 2017 |
| DENV-3 | I               | LC436661   | Bangladesh       | 2017 |
| DENV-3 | I               | MW396463   | Bangladesh       | 2019 |
| DENV-3 | I               | MW396467   | Bangladesh       | 2019 |
| DENV-3 | I               | MW396462   | Bangladesh       | 2019 |
| DENV-3 | I               | MW396466   | Bangladesh       | 2019 |
| DENV-3 | I               | MW396465   | Bangladesh       | 2019 |
| DENV-3 | I               | MN922035.1 | Bangladesh       | 2019 |
| DENV-3 | I               | MW396469   | Bangladesh       | 2019 |
| DENV-3 | I               | LC436665   | Bangladesh       | 2017 |
| DENV-3 | I               | LC436676   | Bangladesh       | 2017 |
| DENV-3 | I               | MG895255.1 | Malaysia         | 2014 |
| DENV-3 | I               | OL960232.1 | Indonesia        | 2016 |
| DENV-3 | I               | KX224276.1 | Singapore        | 2014 |
| DENV-3 | I               | JN380808.1 | Singapore        | 2009 |
| DENV-3 | I               | MG895276.1 | Indonesia        | 2016 |
| DENV-3 | I               | KY709194.1 | Indonesia        | 2015 |
| DENV-3 | I               | MK629477.1 | Indonesia        | 2013 |
| DENV-3 | I               | KX224295.1 | Singapore        | 2013 |
| DENV-3 | I               | MW369334.1 | Myanmar          | 2018 |
| DENV-3 | I               | MZ636820.1 | Thailand         | 2020 |
| DENV-3 | I               | MW788878.1 | Myanmar          | 2017 |
| DENV-3 | I               | MH594462.1 | Vietnam          | 2018 |
| DENV-3 | I               | MF682969.1 | China            | 2016 |
| DENV-3 | I               | MW788900.1 | Myanmar          | 2018 |
| DENV-3 | I               | MZ636815.1 | Thailand         | 2018 |

|        |    |            |                  |      |
|--------|----|------------|------------------|------|
| DENV-3 | I  | MG933850.1 | China            | 2017 |
| DENV-3 | I  | MW301594.1 | China            | 2015 |
| DENV-3 | I  | KY006150.1 | Indonesia        | 2015 |
| DENV-3 | I  | KY921906   | Singapore        | 2015 |
| DENV-3 | I  | MG895273.1 | Singapore        | 2016 |
| DENV-3 | I  | OK180538.1 | Indonesia        | 2016 |
| DENV-3 | I  | JN406515   | Australia        | 2008 |
| DENV-3 | I  | KC762691   | Indonesia        | 2008 |
| DENV-3 | I  | AY858037   | Indonesia        | 2004 |
| DENV-3 | I  | KY794787   | Papua New Guinea | 2007 |
| DENV-3 | I  | KX380839   | Singapore        | 2012 |
| DENV-3 | I  | EU081223   | Singapore        | 2005 |
| DENV-3 | I  | AB189126   | Indonesia        | 1998 |
| DENV-3 | I  | KC762686   | Indonesia        | 2007 |
| DENV-3 | I  | KU509279   | Philippines      | 2008 |
| DENV-3 | I  | L11429.1   | Malaysia         | 1974 |
| DENV-3 | I  | JQ920480   | French Polynesia | 1996 |
| DENV-3 | I  | MW946955   | Indonesia        | 1978 |
| DENV-3 | I  | L11432.1   | Philippines      | 1983 |
| DENV-3 | I  | ON115022.1 | Bangladesh       | 2021 |
| DENV-3 | I  | ON127419.1 | Bangladesh       | 2021 |
| DENV-3 | I  | ON115030.1 | Bangladesh       | 2021 |
| DENV-3 | I  | OP741243.1 | Bangladesh       | 2021 |
| DENV-3 | I  | ON115024.1 | Bangladesh       | 2021 |
| DENV-3 | I  | ON111446.1 | Bangladesh       | 2021 |
| DENV-3 | I  | ON103391.1 | Bangladesh       | 2021 |
| DENV-3 | I  | ON115183.1 | Bangladesh       | 2021 |
| DENV-3 | I  | OP741244.1 | Bangladesh       | 2021 |
| DENV-3 | I  | ON127553.1 | Bangladesh       | 2021 |
| DENV-3 | I  | ON115817.1 | Bangladesh       | 2021 |
| DENV-3 | I  | ON115812.1 | Bangladesh       | 2021 |
| DENV-3 | I  | OP740753.1 | Bangladesh       | 2021 |
| DENV-3 | I  | ON127534.1 | Bangladesh       | 2021 |
| DENV-3 | I  | OK079104.1 | Bangladesh       | 2020 |
| DENV-3 | I  | ON127538.1 | Bangladesh       | 2021 |
| DENV-3 | I  | ON115815.1 | Bangladesh       | 2021 |
| DENV-3 | I  | ON115026.1 | Bangladesh       | 2021 |
| DENV-3 | I  | ON115819.1 | Bangladesh       | 2021 |
| DENV-3 | I  | ON127551.1 | Bangladesh       | 2021 |
| DENV-3 | I  | ON103303.1 | Bangladesh       | 2021 |
| DENV-3 | II | JN036390   | Bangladesh       | 2006 |
| DENV-3 | II | JN036393   | Bangladesh       | 2006 |
| DENV-3 | II | JN036388   | Bangladesh       | 2006 |
| DENV-3 | II | JN036394   | Bangladesh       | 2006 |
| DENV-3 | II | JN036389   | Bangladesh       | 2006 |
| DENV-3 | II | JN036382   | Bangladesh       | 2008 |
| DENV-3 | II | JN036395   | Bangladesh       | 2006 |
| DENV-3 | II | JN036383   | Bangladesh       | 2008 |
| DENV-3 | II | JN036391   | Bangladesh       | 2006 |

|        |     |           |             |      |
|--------|-----|-----------|-------------|------|
| DENV-3 | II  | JF968064  | Bangladesh  | 2008 |
| DENV-3 | II  | JN036381  | Bangladesh  | 2009 |
| DENV-3 | II  | JN036384  | Bangladesh  | 2008 |
| DENV-3 | II  | JN036386  | Bangladesh  | 2007 |
| DENV-3 | II  | JN036387  | Bangladesh  | 2006 |
| DENV-3 | II  | JN036392  | Bangladesh  | 2006 |
| DENV-3 | II  | JN036385  | Bangladesh  | 2007 |
| DENV-3 | II  | EU448446  | Bangladesh  | 2006 |
| DENV-3 | II  | EU448445  | Bangladesh  | 2007 |
| DENV-3 | II  | JF968085  | Bangladesh  | 2009 |
| DENV-3 | II  | AY496874  | Bangladesh  | 2002 |
| DENV-3 | II  | DQ401691  | Bangladesh  | 2002 |
| DENV-3 | II  | DQ401692  | Bangladesh  | 2004 |
| DENV-3 | II  | AY496877  | Bangladesh  | 2002 |
| DENV-3 | II  | AY496873  | Bangladesh  | 2002 |
| DENV-3 | II  | DQ401693  | Bangladesh  | 2007 |
| DENV-3 | II  | AY496871  | Bangladesh  | 2002 |
| DENV-3 | II  | DQ401689  | Bangladesh  | 2002 |
| DENV-3 | II  | AY496872  | Bangladesh  | 2002 |
| DENV-3 | II  | AY496875  | Bangladesh  | 2002 |
| DENV-3 | II  | AY496878  | Bangladesh  | 2002 |
| DENV-3 | II  | AY496876  | Bangladesh  | 2002 |
| DENV-3 | II  | DQ518665  | Bangladesh  | 2001 |
| DENV-3 | II  | AY656673  | Bangladesh  | 2001 |
| DENV-3 | II  | AY656671  | Bangladesh  | 2000 |
| DENV-3 | II  | AY656669  | Bangladesh  | 2000 |
| DENV-3 | II  | AY656670  | Bangladesh  | 2000 |
| DENV-3 | II  | AY656674  | Bangladesh  | 2000 |
| DENV-3 | II  | AY656672  | Bangladesh  | 2001 |
| DENV-3 | II  | DQ675531  | Taiwan      | 1998 |
| DENV-3 | II  | KU509280  | Thailand    | 2011 |
| DENV-3 | II  | KF955460  | Vietnam     | 2008 |
| DENV-3 | II  | FJ687448  | Thailand    | 2001 |
| DENV-3 | II  | KF955477  | India       | 1984 |
| DENV-3 | II  | GQ868593  | Thailand    | 1973 |
| DENV-3 | III | JX669490  | Brazil      | 2002 |
| DENV-3 | III | FJ882576  | Nicaragua   | 1994 |
| DENV-3 | III | KX380842  | Singapore   | 2013 |
| DENV-3 | III | LC410192  | Thailand    | 2016 |
| DENV-3 | III | NC 001475 | Sri Lanka   | 2000 |
| DENV-3 | III | GQ199887  | Sri Lanka   | 1983 |
| DENV-3 | IV  | L11433    | Puerto Rico | 1963 |
| DENV-3 | IV  | L11439    | Tahiti      | 1965 |
| DENV-3 | IV  | L11434    | Puerto Rico | 1977 |
| DENV-3 | V   | EF629370  | Brazil      | 2002 |
| DENV-3 | V   | KU050695  | Philippines | 1956 |
| DENV-3 | V   | JQ922554  | USA         | 1963 |
| DENV-3 | V   | KM190937  | Philippines | 1964 |



**Table S3. Newly determined Sequences in the present study**

| <b>Serotype</b> | <b>Genotype</b> | <b>Sequence ID</b> | <b>Accession Number</b> | <b>Country</b> | <b>Year</b> |
|-----------------|-----------------|--------------------|-------------------------|----------------|-------------|
| DENV-1          | V               | D1-18-01           | OQ826841                | Bangladesh     | 2018        |
| DENV-1          | V               | D1-18-02           | OQ826842                | Bangladesh     | 2018        |
| DENV-1          | V               | D1-18-03           | OQ826843                | Bangladesh     | 2018        |
| DENV-1          | V               | D1-18-04           | OQ826844                | Bangladesh     | 2018        |
| DENV-1          | V               | D1-18-05           | OQ826845                | Bangladesh     | 2018        |
| DENV-1          | V               | D1-19-06           | OQ826846                | Bangladesh     | 2019        |
| DENV-1          | V               | D1-19-07           | OQ826847                | Bangladesh     | 2019        |
| DENV-1          | V               | D1-19-08           | OQ826848                | Bangladesh     | 2019        |
| DENV-1          | V               | D1-19-09           | OQ826849                | Bangladesh     | 2019        |
| DENV-2          | Cosmopolitan C  | D2-18-01           | OQ826850                | Bangladesh     | 2018        |
| DENV-2          | Cosmopolitan C  | D2-18-02           | OQ826851                | Bangladesh     | 2018        |
| DENV-2          | Cosmopolitan C  | D2-18-03           | OQ826852                | Bangladesh     | 2018        |
| DENV-2          | Cosmopolitan C  | D2-18-04           | OQ826853                | Bangladesh     | 2018        |
| DENV-2          | Cosmopolitan C  | D2-18-05           | OQ826854                | Bangladesh     | 2018        |
| DENV-2          | Cosmopolitan C  | D2-18-06           | OQ826855                | Bangladesh     | 2018        |
| DENV-2          | Cosmopolitan C  | D2-18-07           | OQ826856                | Bangladesh     | 2018        |
| DENV-2          | Cosmopolitan C  | D2-18-08           | OQ826857                | Bangladesh     | 2018        |
| DENV-2          | Cosmopolitan C  | D2-18-09           | OQ826858                | Bangladesh     | 2018        |
| DENV-2          | Cosmopolitan C  | D2-18-10           | OQ826859                | Bangladesh     | 2018        |
| DENV-2          | Cosmopolitan C  | D2-18-11           | OQ826860                | Bangladesh     | 2018        |
| DENV-2          | Cosmopolitan C  | D2-18-12           | OQ826861                | Bangladesh     | 2018        |
| DENV-2          | Cosmopolitan C  | D2-18-13           | OQ826862                | Bangladesh     | 2018        |
| DENV-2          | Cosmopolitan C  | D2-18-14           | OQ826863                | Bangladesh     | 2018        |
| DENV-2          | Cosmopolitan C  | D2-18-15           | OQ826864                | Bangladesh     | 2018        |
| DENV-2          | Cosmopolitan C  | D2-18-16           | OQ826865                | Bangladesh     | 2018        |
| DENV-2          | Cosmopolitan C  | D2-18-17           | OQ826866                | Bangladesh     | 2018        |
| DENV-2          | Cosmopolitan C  | D2-18-19           | OQ826867                | Bangladesh     | 2018        |
| DENV-2          | Cosmopolitan C  | D2-18-20           | OQ826868                | Bangladesh     | 2018        |
| DENV-2          | Cosmopolitan C  | D2-18-21           | OQ826869                | Bangladesh     | 2018        |
| DENV-2          | Cosmopolitan C  | D2-18-23           | OQ826870                | Bangladesh     | 2018        |
| DENV-2          | Cosmopolitan C  | D2-18-24           | OQ826871                | Bangladesh     | 2018        |
| DENV-2          | Cosmopolitan C  | D2-18-25           | OQ826872                | Bangladesh     | 2018        |
| DENV-2          | Cosmopolitan C  | D2-18-27           | OQ826873                | Bangladesh     | 2018        |
| DENV-2          | Cosmopolitan C  | D2-18-28           | OQ826874                | Bangladesh     | 2018        |
| DENV-2          | Cosmopolitan C  | D2-18-29           | OQ826875                | Bangladesh     | 2018        |
| DENV-2          | Cosmopolitan C  | D2-18-31           | OQ826876                | Bangladesh     | 2018        |
| DENV-2          | Cosmopolitan C  | D2-18-32           | OQ826877                | Bangladesh     | 2018        |
| DENV-2          | Cosmopolitan C  | D2-18-33           | OQ826878                | Bangladesh     | 2018        |
| DENV-2          | Cosmopolitan C  | D2-18-35           | OQ826879                | Bangladesh     | 2018        |

|        |   |          |          |            |      |
|--------|---|----------|----------|------------|------|
| DENV-3 | I | D3-18-01 | OQ826880 | Bangladesh | 2018 |
| DENV-3 | I | D3-18-02 | OQ826881 | Bangladesh | 2018 |
| DENV-3 | I | D3-18-03 | OQ826882 | Bangladesh | 2018 |
| DENV-3 | I | D3-18-04 | OQ826883 | Bangladesh | 2018 |
| DENV-3 | I | D3-18-05 | OQ826884 | Bangladesh | 2018 |
| DENV-3 | I | D3-18-06 | OQ826885 | Bangladesh | 2018 |
| DENV-3 | I | D3-18-07 | OQ826886 | Bangladesh | 2018 |
| DENV-3 | I | D3-18-08 | OQ826887 | Bangladesh | 2018 |
| DENV-3 | I | D3-18-09 | OQ826888 | Bangladesh | 2018 |
| DENV-3 | I | D3-18-10 | OQ826889 | Bangladesh | 2018 |
| DENV-3 | I | D3-18-11 | OQ826890 | Bangladesh | 2018 |
| DENV-3 | I | D3-18-12 | OQ826891 | Bangladesh | 2018 |
| DENV-3 | I | D3-18-13 | OQ826892 | Bangladesh | 2018 |
| DENV-3 | I | D3-18-14 | OQ826893 | Bangladesh | 2018 |
| DENV-3 | I | D3-18-15 | OQ826894 | Bangladesh | 2018 |
| DENV-3 | I | D3-18-16 | OQ826895 | Bangladesh | 2018 |
| DENV-3 | I | D3-18-17 | OQ826896 | Bangladesh | 2018 |
| DENV-3 | I | D3-18-18 | OQ826897 | Bangladesh | 2018 |
| DENV-3 | I | D3-18-19 | OQ826898 | Bangladesh | 2018 |
| DENV-3 | I | D3-18-20 | OQ826899 | Bangladesh | 2018 |
| DENV-3 | I | D3-18-21 | OQ826900 | Bangladesh | 2018 |
| DENV-3 | I | D3-18-22 | OQ826901 | Bangladesh | 2018 |
| DENV-3 | I | D3-18-23 | OQ826902 | Bangladesh | 2018 |
| DENV-3 | I | D3-18-24 | OQ826903 | Bangladesh | 2018 |
| DENV-3 | I | D3-19-01 | OQ826904 | Bangladesh | 2019 |
| DENV-3 | I | D3-19-02 | OQ826905 | Bangladesh | 2019 |
| DENV-3 | I | D3-19-03 | OQ826906 | Bangladesh | 2019 |
| DENV-3 | I | D3-19-04 | OQ826907 | Bangladesh | 2019 |
| DENV-3 | I | D3-19-05 | OQ826908 | Bangladesh | 2019 |
| DENV-3 | I | D3-19-07 | OQ826909 | Bangladesh | 2019 |
| DENV-3 | I | D3-19-08 | OQ826910 | Bangladesh | 2019 |
| DENV-3 | I | D3-19-09 | OQ826911 | Bangladesh | 2019 |
| DENV-3 | I | D3-19-10 | OQ826912 | Bangladesh | 2019 |
| DENV-3 | I | D3-19-12 | OQ826913 | Bangladesh | 2019 |
| DENV-3 | I | D3-19-13 | OQ826914 | Bangladesh | 2019 |
| DENV-3 | I | D3-19-14 | OQ826915 | Bangladesh | 2019 |
| DENV-3 | I | D3-19-15 | OQ826916 | Bangladesh | 2019 |
| DENV-3 | I | D3-19-16 | OQ826917 | Bangladesh | 2019 |
| DENV-3 | I | D3-19-17 | OQ826918 | Bangladesh | 2019 |
| DENV-3 | I | D3-19-18 | OQ826919 | Bangladesh | 2019 |
| DENV-3 | I | D3-19-19 | OQ826920 | Bangladesh | 2019 |

|        |   |          |          |            |      |
|--------|---|----------|----------|------------|------|
| DENV-3 | I | D3-19-20 | OQ826921 | Bangladesh | 2019 |
| DENV-3 | I | D3-19-21 | OQ826922 | Bangladesh | 2019 |
| DENV-3 | I | D3-19-22 | OQ826923 | Bangladesh | 2019 |
| DENV-3 | I | D3-19-23 | OQ826924 | Bangladesh | 2019 |
| DENV-3 | I | D3-19-24 | OQ826925 | Bangladesh | 2019 |
| DENV-3 | I | D3-19-25 | OQ826926 | Bangladesh | 2019 |
| DENV-3 | I | D3-19-26 | OQ826927 | Bangladesh | 2019 |
| DENV-3 | I | D3-19-27 | OQ826928 | Bangladesh | 2019 |
| DENV-3 | I | D3-19-28 | OQ826929 | Bangladesh | 2019 |
| DENV-3 | I | D3-19-29 | OQ826930 | Bangladesh | 2019 |
| DENV-3 | I | D3-19-30 | OQ826931 | Bangladesh | 2019 |
| DENV-3 | I | D3-19-31 | OQ826932 | Bangladesh | 2019 |
| DENV-3 | I | D3-19-32 | OQ826933 | Bangladesh | 2019 |
| DENV-3 | I | D3-19-33 | OQ826934 | Bangladesh | 2019 |
| DENV-3 | I | D3-19-34 | OQ826935 | Bangladesh | 2019 |
| DENV-3 | I | D3-19-35 | OQ826936 | Bangladesh | 2019 |
| DENV-3 | I | D3-19-36 | OQ826937 | Bangladesh | 2019 |
| DENV-3 | I | D3-19-37 | OQ826938 | Bangladesh | 2019 |
| DENV-3 | I | D3-19-38 | OQ826939 | Bangladesh | 2019 |
| DENV-3 | I | D3-19-39 | OQ826940 | Bangladesh | 2019 |
| DENV-3 | I | D3-21-01 | OQ826941 | Bangladesh | 2021 |
| DENV-3 | I | D3-21-02 | OQ826942 | Bangladesh | 2021 |
| DENV-3 | I | D3-21-03 | OQ826943 | Bangladesh | 2021 |
| DENV-3 | I | D3-21-04 | OQ826944 | Bangladesh | 2021 |
| DENV-3 | I | D3-21-05 | OQ826945 | Bangladesh | 2021 |
| DENV-3 | I | D3-21-06 | OQ826946 | Bangladesh | 2021 |
| DENV-3 | I | D3-21-07 | OQ826947 | Bangladesh | 2021 |
| DENV-3 | I | D3-21-08 | OQ826948 | Bangladesh | 2021 |
| DENV-3 | I | D3-21-09 | OQ826949 | Bangladesh | 2021 |
| DENV-3 | I | D3-21-10 | OQ826950 | Bangladesh | 2021 |
| DENV-3 | I | D3-21-11 | OQ826951 | Bangladesh | 2021 |
| DENV-3 | I | D3-21-12 | OQ826952 | Bangladesh | 2021 |
| DENV-3 | I | D3-21-13 | OQ826953 | Bangladesh | 2021 |
| DENV-3 | I | D3-21-14 | OQ826954 | Bangladesh | 2021 |
| DENV-3 | I | D3-21-15 | OQ826955 | Bangladesh | 2021 |
| DENV-3 | I | D3-21-16 | OQ826956 | Bangladesh | 2021 |
| DENV-3 | I | D3-21-17 | OQ826957 | Bangladesh | 2021 |
| DENV-3 | I | D3-21-18 | OQ826958 | Bangladesh | 2021 |
| DENV-3 | I | D3-21-19 | OQ826959 | Bangladesh | 2021 |
| DENV-3 | I | D3-21-20 | OQ826960 | Bangladesh | 2021 |
| DENV-3 | I | D3-21-21 | OQ826961 | Bangladesh | 2021 |

|        |   |          |          |            |      |
|--------|---|----------|----------|------------|------|
| DENV-3 | I | D3-21-22 | OQ826962 | Bangladesh | 2021 |
| DENV-3 | I | D3-21-23 | OQ826963 | Bangladesh | 2021 |
| DENV-3 | I | D3-21-24 | OQ826964 | Bangladesh | 2021 |
| DENV-3 | I | D3-21-25 | OQ826965 | Bangladesh | 2021 |
| DENV-3 | I | D3-21-26 | OQ826966 | Bangladesh | 2021 |
| DENV-3 | I | D3-21-27 | OQ826967 | Bangladesh | 2021 |
| DENV-3 | I | D3-21-28 | OQ826968 | Bangladesh | 2021 |
| DENV-3 | I | D3-21-29 | OQ826969 | Bangladesh | 2021 |
| DENV-3 | I | D3-21-30 | OQ826970 | Bangladesh | 2021 |
| DENV-3 | I | D3-21-31 | OQ826971 | Bangladesh | 2021 |
| DENV-3 | I | D3-21-32 | OQ826972 | Bangladesh | 2021 |
| DENV-3 | I | D3-21-33 | OQ826973 | Bangladesh | 2021 |
| DENV-3 | I | D3-21-34 | OQ826974 | Bangladesh | 2021 |
| DENV-3 | I | D3-21-35 | OQ826975 | Bangladesh | 2021 |
| DENV-3 | I | D3-21-36 | OQ826976 | Bangladesh | 2021 |
| DENV-3 | I | D3-21-37 | OQ826977 | Bangladesh | 2021 |
| DENV-3 | I | D3-21-38 | OQ826978 | Bangladesh | 2021 |
| DENV-3 | I | D3-21-39 | OQ826979 | Bangladesh | 2021 |
| DENV-3 | I | D3-21-40 | OQ826980 | Bangladesh | 2021 |
| DENV-3 | I | D3-22-01 | OQ826981 | Bangladesh | 2022 |
| DENV-3 | I | D3-22-02 | OQ826982 | Bangladesh | 2022 |
| DENV-3 | I | D3-22-03 | OQ826983 | Bangladesh | 2022 |
| DENV-3 | I | D3-22-04 | OQ826984 | Bangladesh | 2022 |
| DENV-3 | I | D3-22-05 | OQ826985 | Bangladesh | 2022 |
| DENV-3 | I | D3-22-06 | OQ826986 | Bangladesh | 2022 |
| DENV-3 | I | D3-22-07 | OQ826987 | Bangladesh | 2022 |
| DENV-3 | I | D3-22-08 | OQ826988 | Bangladesh | 2022 |
| DENV-3 | I | D3-22-09 | OQ826989 | Bangladesh | 2022 |
| DENV-3 | I | D3-22-10 | OQ826990 | Bangladesh | 2022 |
| DENV-3 | I | D3-22-11 | OQ826991 | Bangladesh | 2022 |
| DENV-3 | I | D3-22-12 | OQ826992 | Bangladesh | 2022 |
| DENV-3 | I | D3-22-13 | OQ826993 | Bangladesh | 2022 |
| DENV-3 | I | D3-22-14 | OQ826994 | Bangladesh | 2022 |
| DENV-3 | I | D3-22-15 | OQ826995 | Bangladesh | 2022 |
| DENV-3 | I | D3-22-16 | OQ826996 | Bangladesh | 2022 |
| DENV-3 | I | D3-22-17 | OQ826997 | Bangladesh | 2022 |
| DENV-3 | I | D3-22-18 | OQ826998 | Bangladesh | 2022 |
| DENV-3 | I | D3-22-19 | OQ826999 | Bangladesh | 2022 |
| DENV-3 | I | D3-22-20 | OQ827000 | Bangladesh | 2022 |
| DENV-3 | I | D3-22-21 | OQ827001 | Bangladesh | 2022 |
| DENV-3 | I | D3-22-22 | OQ827002 | Bangladesh | 2022 |

|        |   |          |          |            |      |
|--------|---|----------|----------|------------|------|
| DENV-3 | I | D3-22-23 | OQ827003 | Bangladesh | 2022 |
| DENV-3 | I | D3-22-24 | OQ827004 | Bangladesh | 2022 |
| DENV-3 | I | D3-22-25 | OQ827005 | Bangladesh | 2022 |
| DENV-3 | I | D3-22-26 | OQ827006 | Bangladesh | 2022 |
| DENV-3 | I | D3-22-27 | OQ827007 | Bangladesh | 2022 |
| DENV-3 | I | D3-22-28 | OQ827008 | Bangladesh | 2022 |
| DENV-3 | I | D3-22-29 | OQ827009 | Bangladesh | 2022 |
| DENV-3 | I | D3-22-30 | OQ827010 | Bangladesh | 2022 |
| DENV-3 | I | D3-22-31 | OQ827011 | Bangladesh | 2022 |
| DENV-3 | I | D3-22-32 | OQ827012 | Bangladesh | 2022 |
| DENV-3 | I | D3-22-33 | OQ827013 | Bangladesh | 2022 |
| DENV-3 | I | D3-22-34 | OQ827014 | Bangladesh | 2022 |
| DENV-3 | I | D3-22-35 | OQ827015 | Bangladesh | 2022 |
| DENV-3 | I | D3-22-36 | OQ827016 | Bangladesh | 2022 |
| DENV-3 | I | D3-22-37 | OQ827017 | Bangladesh | 2022 |
| DENV-3 | I | D3-22-38 | OQ827018 | Bangladesh | 2022 |
| DENV-3 | I | D3-22-39 | OQ827019 | Bangladesh | 2022 |

**Table S4.** Age and sex distribution of study population (serotype-positive)

| Age<br>(Years) | 2018 (n=127) |               | 2019 (n=86) |               | 2020 (n=01) |               | 2021 (n=178) |               | 2022 (n=103) |               |
|----------------|--------------|---------------|-------------|---------------|-------------|---------------|--------------|---------------|--------------|---------------|
|                | Male<br>(%)  | Female<br>(%) | Male<br>(%) | Female<br>(%) | Male<br>(%) | Female<br>(%) | Male<br>(%)  | Female<br>(%) | Male<br>(%)  | Female<br>(%) |
| <1             | 10 (7.9)     | 5 (3.9)       | 2 (2.3)     | 2 (2.3)       | 0           | 0             | 1 (0.6)      | 2 (1.1)       | 2 (1.94)     | 1 (0.97)      |
| 1 – 10         | 18 (14.2)    | 12 (9.4)      | 18(20.9)    | 15(17.4)      | 0           | 0             | 12 (6.7)     | 10 (5.6)      | 18(17.48)    | 13(12.62)     |
| 11-20          | 13 (10.2)    | 6 (4.7)       | 11(12.8)    | 11(12.8)      | 0           | 0             | 33(18.5)     | 12 (6.7)      | 12(11.65)    | 7 (6.8)       |
| 21-30          | 6 (4.7)      | 7 (5.5)       | 3 (3.5)     | 4 (4.6)       | 0           | 0             | 24(13.5)     | 8 (4.5)       | 10(9.71)     | 7 (6.8)       |
| 31-40          | 12 (9.4)     | 8 (6.3)       | 4 (4.6)     | 3 (3.5)       | 0           | 0             | 24(13.5)     | 16 (9)        | 8 (7.77)     | 8 (7.77)      |
| 41-50          | 10 (7.9)     | 7 (5.5)       | 3 (3.5)     | 1 (1.2)       | 1(100)      | 0             | 11 (6.2)     | 7 (3.9)       | 6 (5.83)     | 4 (3.88)      |
| 51-60          | 6 (4.7)      | 2 (1.6)       | 6 (7)       | 2 (2.3)       | 0           | 0             | 4 (2.2)      | 5 (2.8)       | 0            | 1 (0.97)      |
| 61-70          | 2 (1.6)      | 1 (0.8)       | 0           | 1 (1.2)       | 0           | 0             | 1 (0.6)      | 3 (1.7)       | 2 (1.94)     | 1 (0.97)      |
| >70            | 1 (0.8)      | 1 (0.8)       | 0           | 0             | 0           | 0             | 1 (0.6)      | 4 (2.2)       | 2 (1.94)     | 1 (0.97)      |
| Total          | 78 (61.42)   | 49(38.58)     | 47(54.65)   | 39(45.35)     | 1(100)      | 0             | 111(62.36)   | 67(37.64)     | 60(58.25)    | 43(41.75)     |

**Table S5.** Severity of sequenced serotypes during the period 2018–2022

| Year  | Sequenced Serotypes and severity distribution |                     |             |           |                  |            | Total sequenced serotype (%) |
|-------|-----------------------------------------------|---------------------|-------------|-----------|------------------|------------|------------------------------|
|       | DENV1 (%)                                     | Classical DENV2 (%) | DENV3 (%)   | DENV1 (%) | Severe DENV2 (%) | DENV3 (%)  |                              |
| 2018  | 5 (8.47)                                      | 26 (44.07)          | 23 (38.98)  | 0         | 4 (6.78)         | 1 (1.69)   | 59 (32.96)                   |
| 2019  | 4(9.76)                                       | 0                   | 21 (51.22)  | 0         | 0                | 16 (39.02) | 41 (22.91)                   |
| 2020  | 0                                             | 0                   | 0           | 0         | 0                | 0          | 0                            |
| 2021  | 0                                             | 0                   | 34 (85)     | 0         | 0                | 6 (15)     | 40 (22.35)                   |
| 2022  | 0                                             | 0                   | 35 (89.74)  | 0         | 0                | 4 (10.26)  | 39 (21.79)                   |
| Total | 9 (5.03)                                      | 26 (14.53)          | 113 (63.13) | 0         | 4 (2.23)         | 27 (15.08) | 179 (100)                    |
